# Supplementary material for: One-pot synthesis of oxamidato-bridged hexarhenium trigonal prisms adorned with ester functionality
Source: Royal Society of Chemistry journal article supplement (doi:10.1039/c5dt01102g), 2015-01-01
Supplement: c5dt01102g1.pdf [file c5dt01102g1.pdf]

## Electronic Supporting Information

# One-pot Synthesis of Oxamidato-Bridged Hexarhenium Trigonal Prisms Adorned with Ester Functionality

R. Nagarajaprakash, R. Govindarajan and Bala. Manimaran\*

Department of Chemistry, Pondicherry University, Puducherry, 605014, India

\* Corresponding author. Tel.: +91-413-2654 414; fax: +91-413-2656 740

Email: [manimaran.che@pondiuni.edu.in](mailto:manimaran.che@pondiuni.edu.in)

**Table S1** Crystallographic Data and Structure Refinement for **4**

|                                                                               |                                                                                  |
|-------------------------------------------------------------------------------|----------------------------------------------------------------------------------|
| Formula                                                                       | C <sub>114</sub> H <sub>72</sub> N <sub>12</sub> O <sub>36</sub> Re <sub>6</sub> |
| Formula Weight                                                                | 3303.09                                                                          |
| Crystal system                                                                | monoclinic                                                                       |
| Temperature (K)                                                               | 150                                                                              |
| Space group                                                                   | C2/n                                                                             |
| <i>a</i> /Å                                                                   | 34.648(2)                                                                        |
| <i>b</i> /Å                                                                   | 27.6088(13)                                                                      |
| <i>c</i> /Å                                                                   | 14.0477(9)                                                                       |
| $\alpha$ /°                                                                   | 90.00                                                                            |
| $\beta$ /°                                                                    | 101.403(7)                                                                       |
| $\gamma$ /°                                                                   | 90.00                                                                            |
| Unit cell volume/Å <sup>3</sup>                                               | 13172.7(13)                                                                      |
| No. of formula units per unit cell, <i>Z</i>                                  | 4                                                                                |
| <i>F</i> (000)                                                                | 6326.0                                                                           |
| <i>D</i> <sub>calc</sub> (mg mm <sup>-3</sup> )                               | 1.669                                                                            |
| Absorption Coefficient (mm <sup>-1</sup> )                                    | 5.568                                                                            |
| Theta range for data collection (deg)                                         | 5.32 to 50.00                                                                    |
| Crystal size (mm)                                                             | 0.4 × 0.4 × 0.1                                                                  |
| No. of Reflections measured                                                   | 28381                                                                            |
| No. of Independent reflections                                                | 11593                                                                            |
| <i>R</i> <sub>int</sub>                                                       | 0.0479                                                                           |
| Final <i>R</i> <sub><i>I</i></sub> values ( <i>I</i> > 2σ( <i>I</i> ))        | 0.0629                                                                           |
| Final <i>wR</i> ( <i>F</i> <sup>2</sup> ) values ( <i>I</i> > 2σ( <i>I</i> )) | 0.1562                                                                           |
| Final <i>R</i> <sub><i>I</i></sub> values (all data)                          | 0.1131                                                                           |
| Final <i>wR</i> ( <i>F</i> <sup>2</sup> ) values (all data)                   | 0.1779                                                                           |
| Largest diff. peak and hole (e Å <sup>-3</sup> )                              | 2.27 and -2.30                                                                   |
| Goodness-of-fit on <i>F</i> <sup>2</sup>                                      | 1.037                                                                            |
| CCDC number                                                                   | 1052630                                                                          |

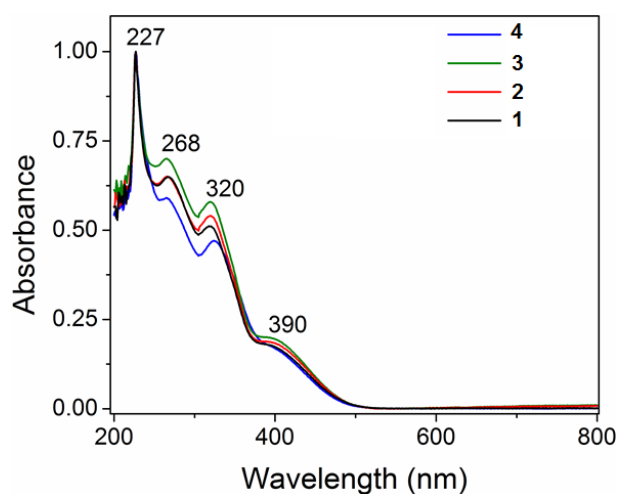**Fig. S1** UV-vis absorption spectra of compounds **1–4**.

## Experimental Details for UV-vis and Fluorescence titration experiments

3 mL ( $2 \times 10^{-5}$  M) stock solution of respective guest in dichloromethane or methanol was prepared and taken in a quartz cell of 1 cm width.  $2 \times 10^{-7}$  M stock solutions of the host **2** were added to the stock solution of guests in an incremental manner and the corresponding absorption spectra were recorded at constant intervals. Fluorescence titration experiments were carried out in an identical fashion.

The binding constants ( $K_a$ ) were calculated using Benesi-Hildebrand equation (1) from UV-vis spectroscopic titration data.<sup>1</sup>

$$1/\Delta A = 1/\Delta A_{\text{sat}} + 1/(\Delta A_{\text{sat}} K_a [\text{host}]) \quad (1)$$

where,  $\Delta A$  is the change in absorbance of guest upon addition of host and  $\Delta A_{\text{sat}}$  is the maximum absorbance difference. The binding constant ( $K_a$ ) was evaluated graphically by plotting  $1/\Delta A$  versus  $1/[\text{host}]$ . The experimentally observed data were linearly fitted according to equation (1) and the  $K_a$  values were obtained from the slope and intercept of the line.

The Stern-Volmer constants ( $K_{\text{SV}}$ ) were calculated using Stern-Volmer equation (2) from fluorescence spectroscopic titration data.<sup>2</sup>

$$(I_0/I) = 1 + K_{\text{SV}} [\text{host}] \quad (2)$$

where,  $I_0$  and  $I$  are fluorescence intensities of guest in the absence and presence of host respectively and  $K_{\text{SV}}$  is Stern-Volmer constant. The experimentally observed data were linearly fitted according to equation (2) and the  $K_{\text{SV}}$  values were obtained from the slope of the line.

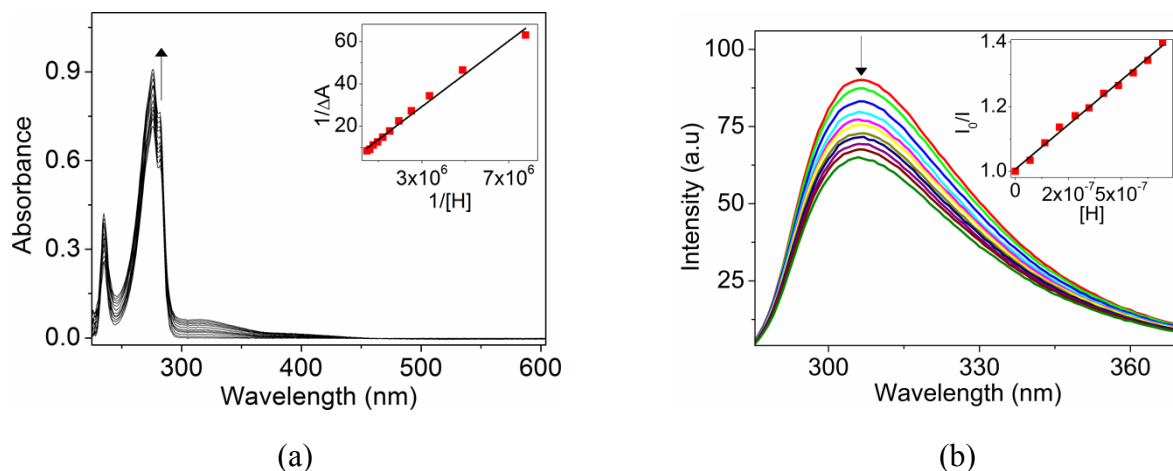

**Fig. S2** (a) Enhancement in absorption pattern of catechol ( $2.6 \times 10^{-4}$  M) upon incremental addition of host **2** ( $6.7\text{--}80 \times 10^{-8}$  M) in dichloromethane and inset shows the corresponding Benesi-Hildebrand plot. Regression analysis was carried out at  $\lambda_{\text{max}}$  282 nm. (b) Emission intensity of catechol ( $2.6 \times 10^{-4}$  M) decreasing with incremental addition of host **2** ( $6.7\text{--}80 \times 10^{-8}$  M) and inset shows the corresponding Stern-Volmer plot. Regression analysis was carried out at  $\lambda_{\text{max}}$  306 nm.

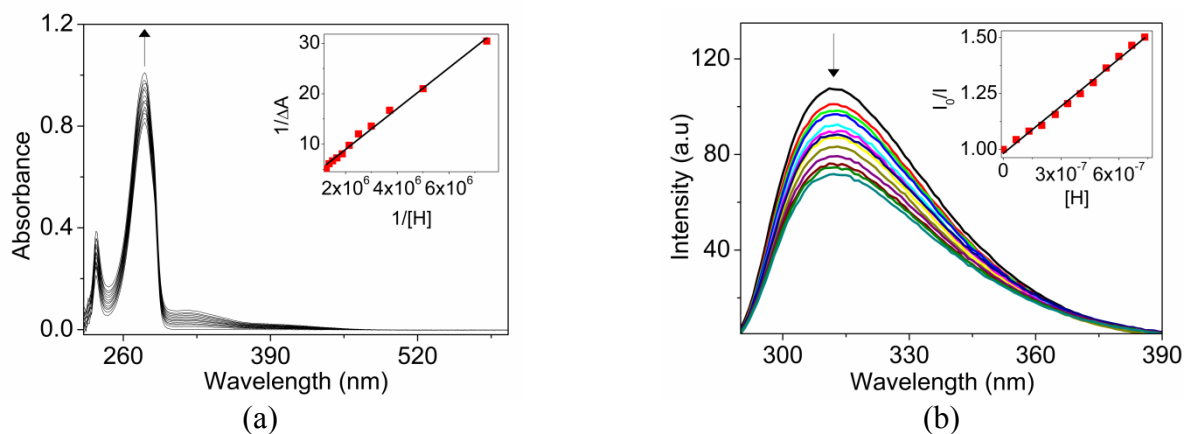

**Fig. S3** (a) Enhancement in absorption pattern of resorcinol ( $2.6 \times 10^{-4}$  M) upon incremental addition of host **2** ( $6.7\text{--}80 \times 10^{-8}$  M) in dichloromethane and inset shows the corresponding Benesi-Hildebrand plot. Regression analysis was carried out at  $\lambda_{\text{max}}$  279 nm. (b) Emission intensity of resorcinol ( $2.6 \times$

$10^{-4}$  M) decreasing with incremental addition of host **2** ( $6.7\text{--}80 \times 10^{-8}$  M) and inset shows the corresponding Stern-Volmer plot. Regression analysis was carried out at  $\lambda_{\text{max}}$  311 nm.

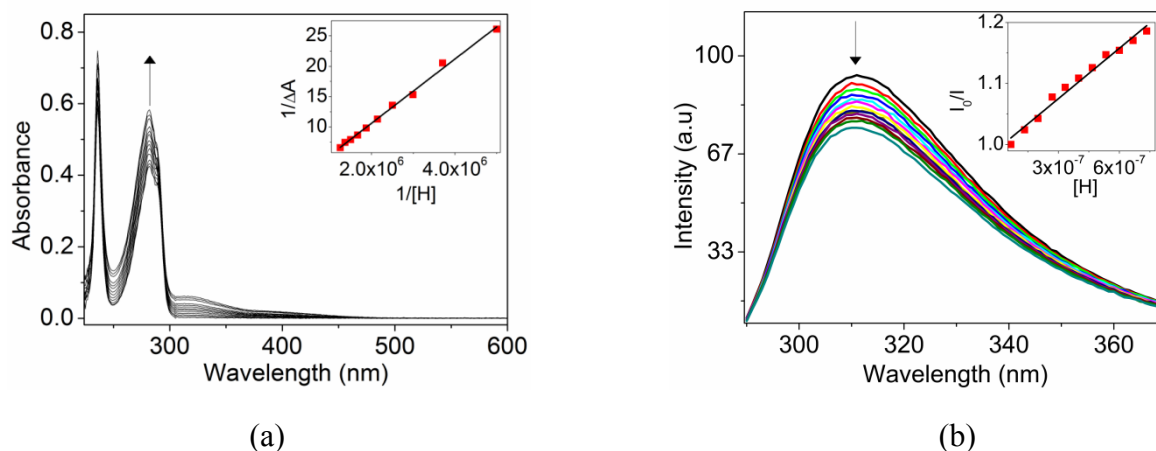

**Fig. S4** (a) Enhancement in absorption pattern of *p*-chloro-*m*-cresol ( $2.6 \times 10^{-4}$  M) upon incremental addition of host **2** ( $6.7\text{--}80 \times 10^{-8}$  M) in dichloromethane and inset shows the corresponding Benesi-Hildebrand plot. Regression analysis was carried out at  $\lambda_{\text{max}}$  282 nm. (b) Emission intensity of *p*-chloro-*m*-cresol ( $2.6 \times 10^{-4}$  M) decreasing with incremental addition of host **2** ( $6.7\text{--}80 \times 10^{-8}$  M) and inset shows the corresponding Stern-Volmer plot. Regression analysis was carried out at  $\lambda_{\text{max}}$  311 nm.

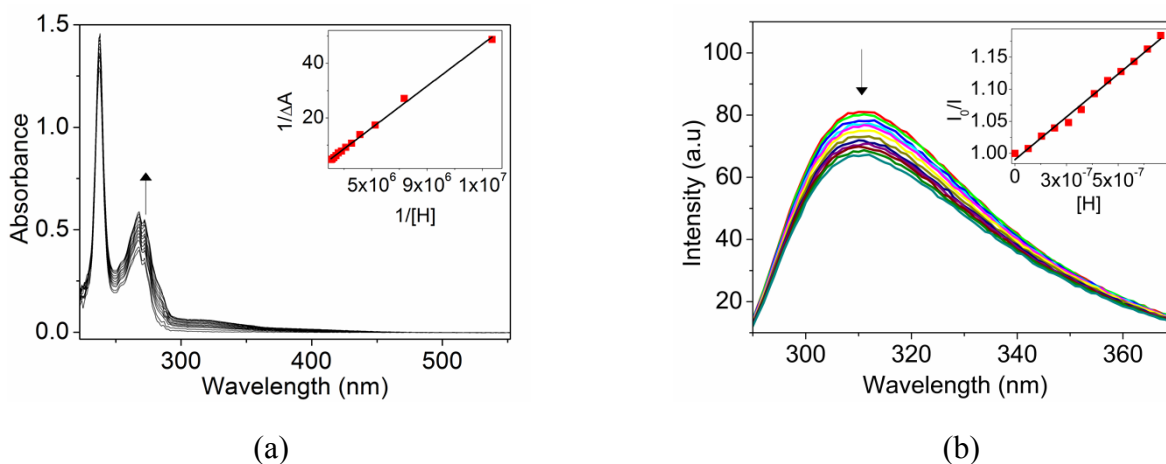

**Fig. S5** (a) Enhancement in absorption pattern of phloroglucinol ( $1.3 \times 10^{-3}$  M) upon incremental addition of host **2** ( $6.7\text{--}80 \times 10^{-8}$  M) in dichloromethane and inset shows the corresponding Benesi-

Hildebrand plot. Regression analysis was carried out at  $\lambda_{\max}$  273 nm. (b) Emission intensity of phloroglucinol ( $1.3 \times 10^{-3}$  M) decreasing with incremental addition of host **2** ( $6.7\text{--}80 \times 10^{-8}$  M) and inset shows the corresponding Stern-Volmer plot. Regression analysis was carried out at  $\lambda_{\max}$  310 nm.

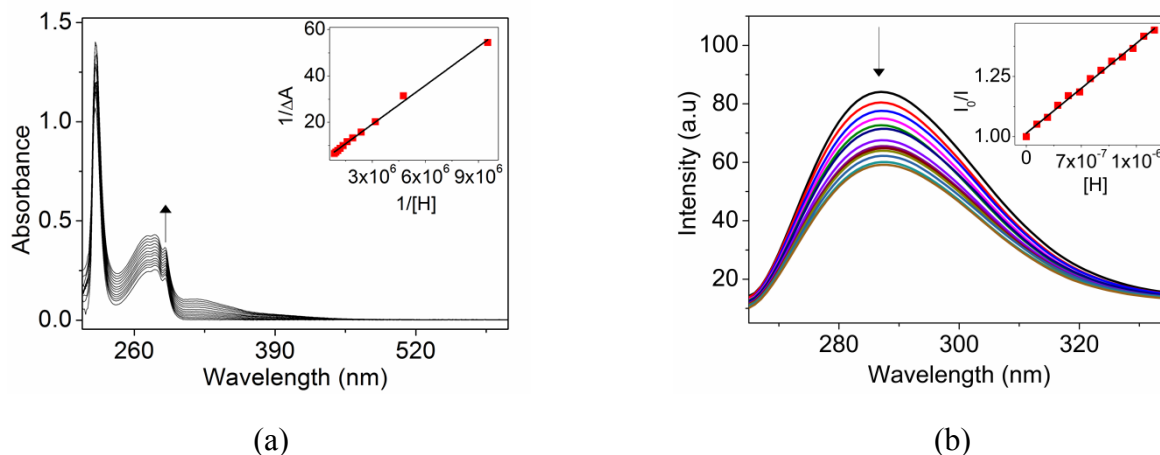

**Fig. S6** (a) Enhancement in absorption pattern of L-tryptophan ( $1.4 \times 10^{-5}$  M) upon incremental addition of host **2** ( $1.3\text{--}16 \times 10^{-7}$  M) in methanol and inset shows the corresponding Benesi-Hildebrand plot. Regression analysis was carried out at  $\lambda_{\max}$  289 nm. (b) Emission intensity of L-tryptophan ( $1.4 \times 10^{-5}$  M) decreasing with incremental addition of host **2** ( $1.3\text{--}16 \times 10^{-7}$  M) and inset shows the corresponding Stern-Volmer plot. Regression analysis was carried out at  $\lambda_{\max}$  287 nm.

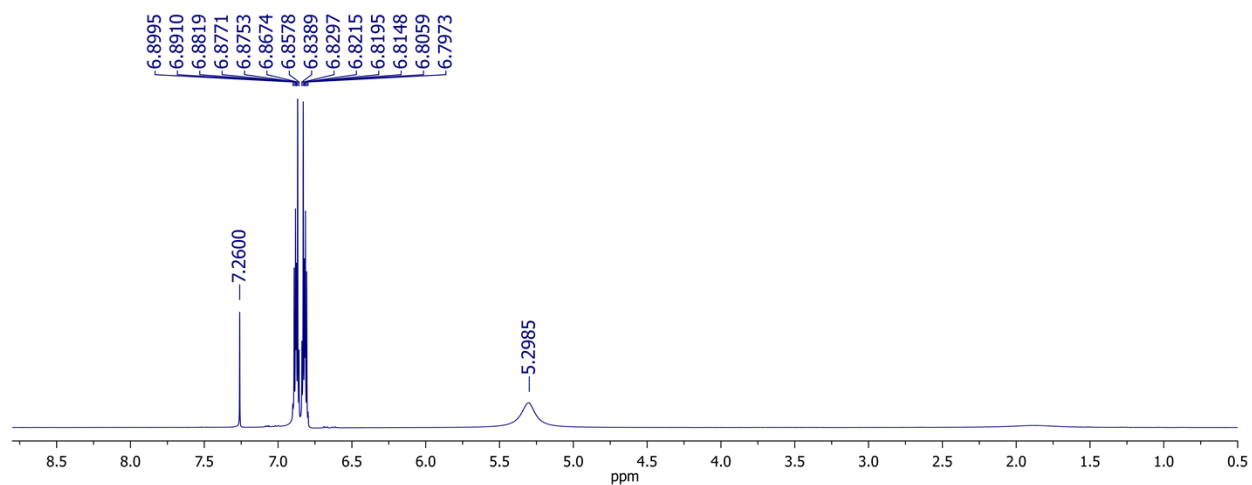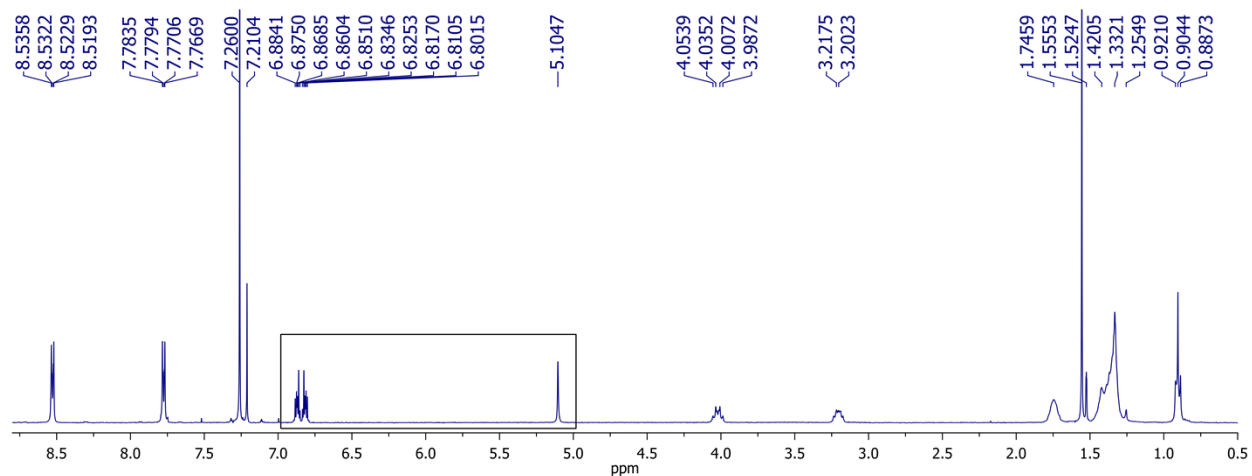

**Fig. S7** (Top)  $^1\text{H}$  NMR spectrum of catechol in  $\text{CDCl}_3$ . (Bottom)  $^1\text{H}$  NMR spectrum of mixture of **2** and catechol (1:3) in  $\text{CDCl}_3$ , in which the signals corresponding to guest species are shown enclosed in a rectangle.

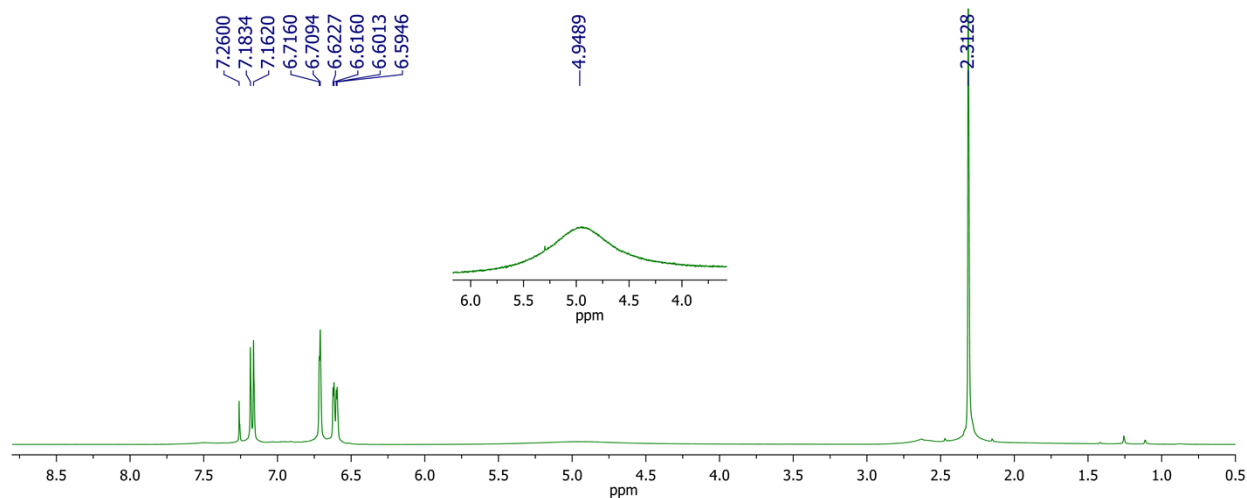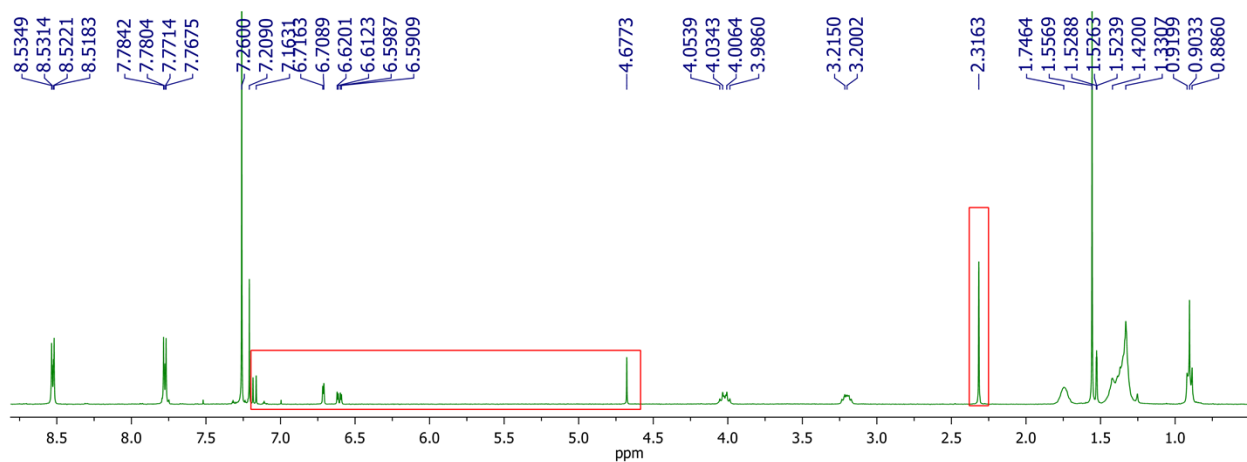

**Fig. S8** (Top)  $^1\text{H}$  NMR spectrum of *p*-chloro-*m*-cresol in  $\text{CDCl}_3$ . (Bottom)  $^1\text{H}$  NMR spectrum of mixture of **2** and *p*-chloro-*m*-cresol (1:3) in  $\text{CDCl}_3$ , in which the signals corresponding to guest species are shown enclosed in a rectangle.



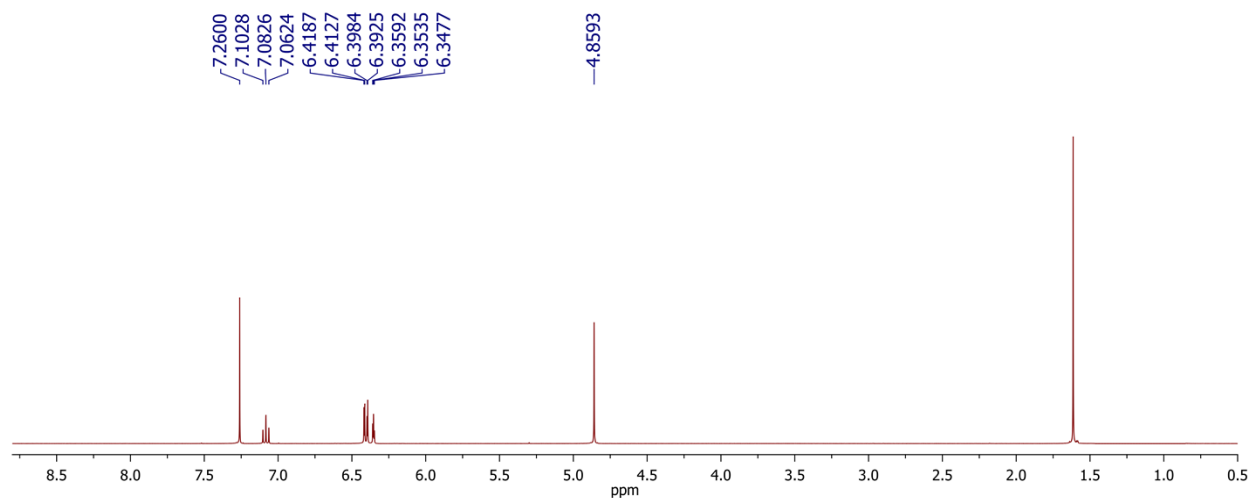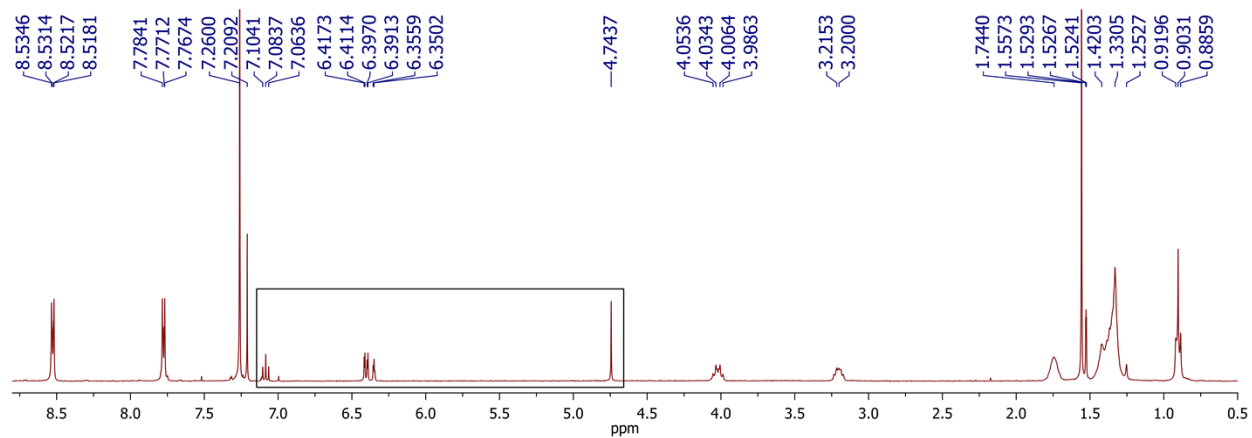

**Fig. S9** (Top)  $^1\text{H}$  NMR spectrum of resorcinol in  $\text{CDCl}_3$ . (Bottom)  $^1\text{H}$  NMR spectrum of mixture of **2** and resorcinol (1:3) in  $\text{CDCl}_3$ , in which the signals corresponding to guest species are shown enclosed in a rectangle.

## Experimental details for Molecular Aggregation studies

Stock solution of **2** and **3** ( $2 \times 10^{-5}$  M) in CH<sub>3</sub>CN were prepared. 0.5 mL of stock solution was transferred to 5 mL volumetric flask and made up to 5 mL using CH<sub>3</sub>CN and H<sub>2</sub>O in the following ratio: (i) 100% CH<sub>3</sub>CN, (ii) 90% CH<sub>3</sub>CN:10% H<sub>2</sub>O, (iii) 80% CH<sub>3</sub>CN:20% H<sub>2</sub>O, (iv) 70% CH<sub>3</sub>CN:30% H<sub>2</sub>O, (v) 60% CH<sub>3</sub>CN:40% H<sub>2</sub>O, (vi) 50% CH<sub>3</sub>CN:50% H<sub>2</sub>O, (vii) 40% CH<sub>3</sub>CN:60% H<sub>2</sub>O, (viii) 30% CH<sub>3</sub>CN:70% H<sub>2</sub>O, (ix) 20% CH<sub>3</sub>CN:80% H<sub>2</sub>O, (x) 10% CH<sub>3</sub>CN:90% H<sub>2</sub>O. The solutions were allowed to stand for 1 h before recording the emission spectra. The solutions remained homogenous without precipitation even after 24 h. Emission quantum yields,  $\Phi_{em}$ , were calculated by relative method, based on the comparison of areas of the fluorescence spectra of a reference ([Ru(bpy)<sub>3</sub>]<sub>2</sub><sup>+</sup>,  $\Phi_{em} = 0.042$ ) and of the sample.<sup>3,4</sup> There were no significant changes in the emission pattern up to 50% water content for **2** and **3**.

**Table S2** Photophysical data of **2**

| Solvent Composition (%) |                  | $\lambda_{max}^{em}$ (nm) | $\Phi_{em}$           |
|-------------------------|------------------|---------------------------|-----------------------|
| CH <sub>3</sub> CN      | H <sub>2</sub> O |                           |                       |
| 100                     | 0                | 609                       | $1.62 \times 10^{-3}$ |
| 40                      | 60               | 602                       | $2.45 \times 10^{-3}$ |
| 30                      | 70               | 590                       | $2.84 \times 10^{-3}$ |
| 20                      | 80               | 571                       | $7.89 \times 10^{-3}$ |
| 10                      | 90               | 566                       | $1.06 \times 10^{-2}$ |

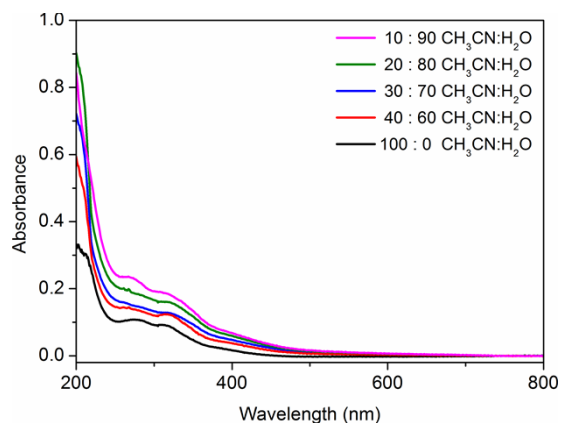

**Fig. S10** UV-vis absorption spectra of **2** with increasing H<sub>2</sub>O content.

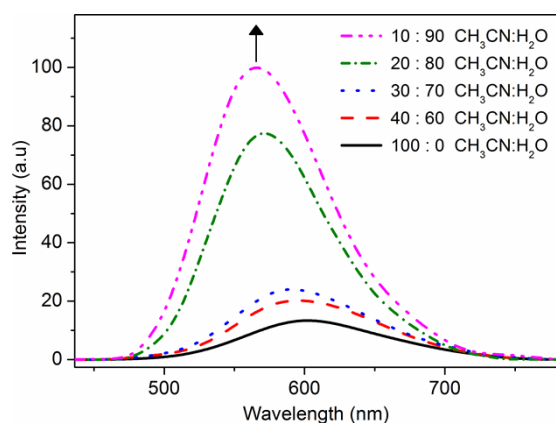

**Fig. S11** Normalized overlay emission spectra of **2** in CH<sub>3</sub>CN, showing emission enhancement upon increasing H<sub>2</sub>O content.

**Table S3** Photophysical data of **3**

| Solvent Composition (%) |                  | $\lambda_{\max}^{\text{em}}$ (nm) | $\Phi_{\text{em}}$    |
|-------------------------|------------------|-----------------------------------|-----------------------|
| CH <sub>3</sub> CN      | H <sub>2</sub> O |                                   |                       |
| 100                     | 0                | 611                               | $2.67 \times 10^{-3}$ |
| 40                      | 60               | 602                               | $1.61 \times 10^{-3}$ |
| 30                      | 70               | 592                               | $2.12 \times 10^{-3}$ |
| 20                      | 80               | 566                               | $1.39 \times 10^{-2}$ |
| 10                      | 90               | 567                               | $2.05 \times 10^{-2}$ |

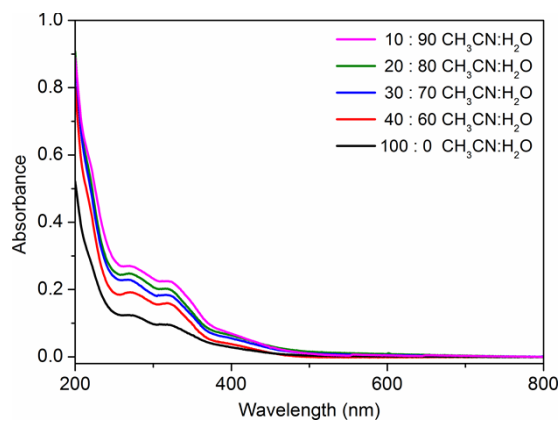

**Fig. S12** UV-vis absorption spectra of **3** with increasing H<sub>2</sub>O content.

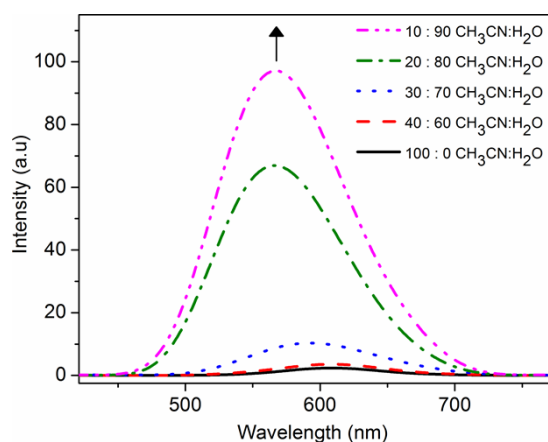

**Fig. S13** Normalized overlay emission spectra of **3** in CH<sub>3</sub>CN, showing emission enhancement upon increasing H<sub>2</sub>O content.

## REFERENCES

- (a) H. A. Benesi and J. H. Hildebrand, *J. Am. Chem. Soc.* 1949, **71**, 2703. (b) S. Shanmugaraju, A. K. Bar and P. S. Mukherjee, *Inorg. Chem.* 2010, **49**, 10235. (c) B. Manimaran, L. J. Lai, P. Thanasekaran, J. Y. Wu, R. T. Liao, T. W. Tseng, Y. H. Liu, G. H. Lee, S. M. Peng and K. L. Lu, *Inorg. Chem.* 2006, **45**, 8070.
- (a) O. Stern, and M. Volmer, *Phys. Z.* 1919, **20**, 183. (b) S. Shanmugaraju, A. K. Bar, S. A. Joshi, Y. P. Patil and P. S. Mukherjee, *Organometallics* **2011**, *30*, 1951–1960. (c) S.

Shanmugaraju, V. Vajpayee, S. Lee, K. W. Chi, P. J. Stang and P. S. Mukherjee, *Inorg. Chem.* 2012, **51**, 4817.

3. P. Thanasekaran, J. Y. Wu, B. Manimaran, T. Rajendran, I. J. Chang, S. Rajagopal, G. H. Lee, S. M. Peng and K. L. Lu, *J. Phys. Chem. A* 2007, **111**, 10953.
4. D. P. Rillema, G. Allen, T. J. Meyer and D. Conrad, *Inorg. Chem.* 1983, **22**, 1617.
